# Supplementary material
Source: PubMed Central journal article supplement (PMC6264894)
Supplement: NIHMS995521-supplement-esi.pdf [file NIHMS995521-supplement-esi.pdf]

## Supplementary Information for Integration of sample preparation and analysis on an optofluidic chip for multi-target disease detection

Gopikrishnan G. Meena<sup>1\*</sup>, Aadhar Jain<sup>1\*</sup>, Joshua W. Parks<sup>1</sup>, Alexandra Stambaugh<sup>1</sup>, Jean L. Patterson<sup>2</sup>, Aaron R. Hawkins<sup>3</sup> and Holger Schmidt<sup>1a</sup>

<sup>1</sup> School of Engineering, University of California Santa Cruz, 1156 High Street, Santa Cruz, CA 95064 USA.

<sup>2</sup> Department of Virology and Immunology, Texas Biomedical Research Institute, 7620 NW Loop 410, San Antonio, TX 78227, USA

<sup>3</sup> ECEn Department, 459 Clyde Building, Brigham Young University, Provo, UT 84602 USA.

## SUPPLEMENTARY FIGURES

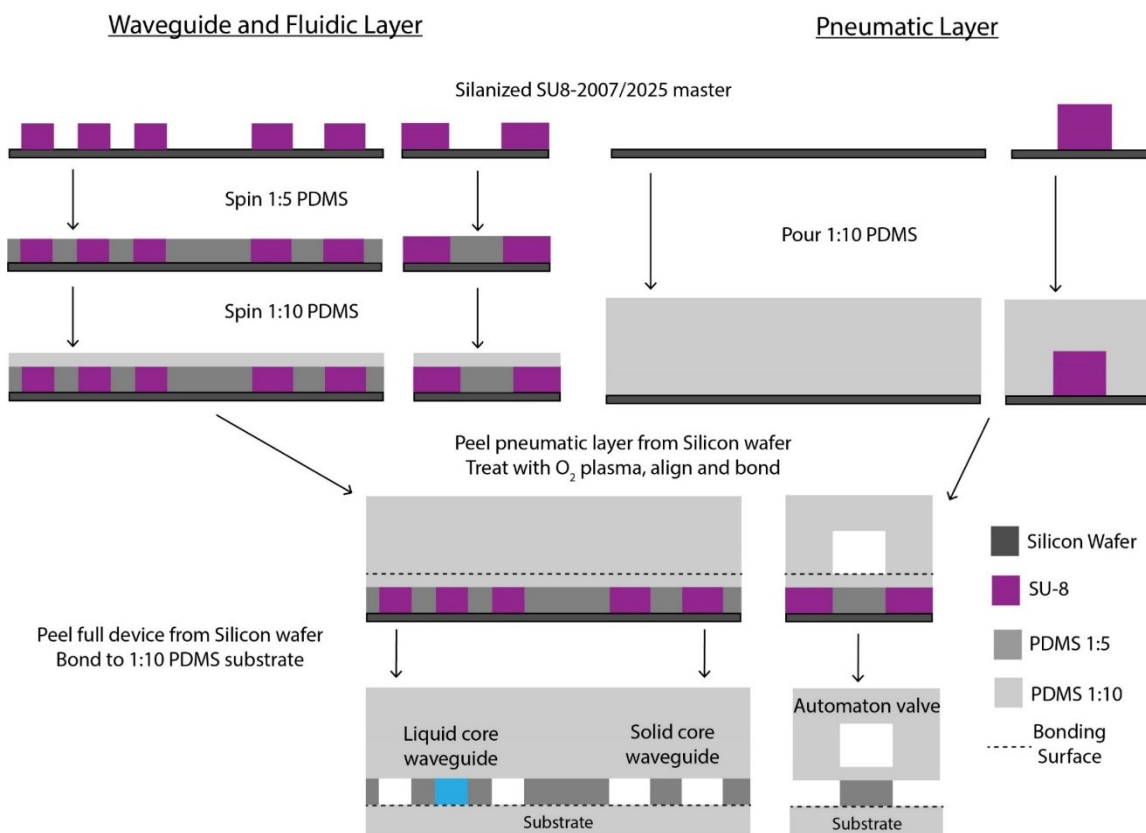

**Supplementary Figure 1: Schematic of the fabrication process for the PDMS chip:** The fabrication is carried out in two separate parts – one for the waveguide and the fluidic layer, while the other for the pneumatic layer. Different mixtures of PDMS are used to create a refractive index contrast – 1:5 (curing agent: base) PDMS mixture for the core, 1:10 (curing agent: base) PDMS mixture for the cladding. After each of the layers has been fabricated, the two PDMS layers are oxygen plasma treated, aligned on a custom built rig and then brought in contact to bond together. In the final step, the device is plasma bonded to a PDMS substrate.

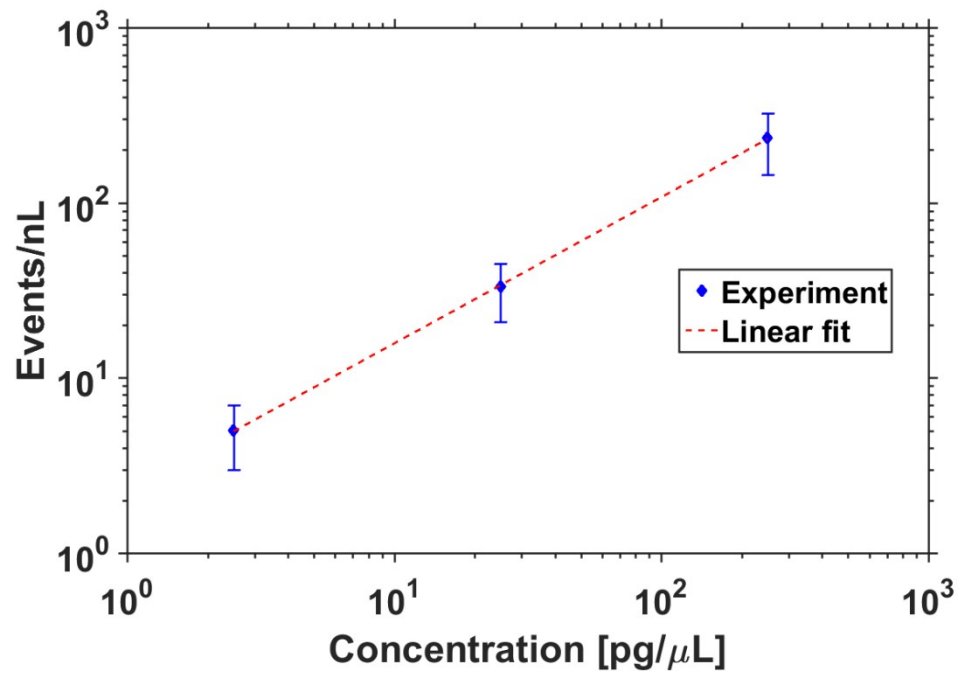

**Supplementary Figure 2: λ-DNA concentration series:** Number of λ-DNA detected per unit volume is plotted as a function of initial sample concentration (in pg/μL) on a log-log scale.

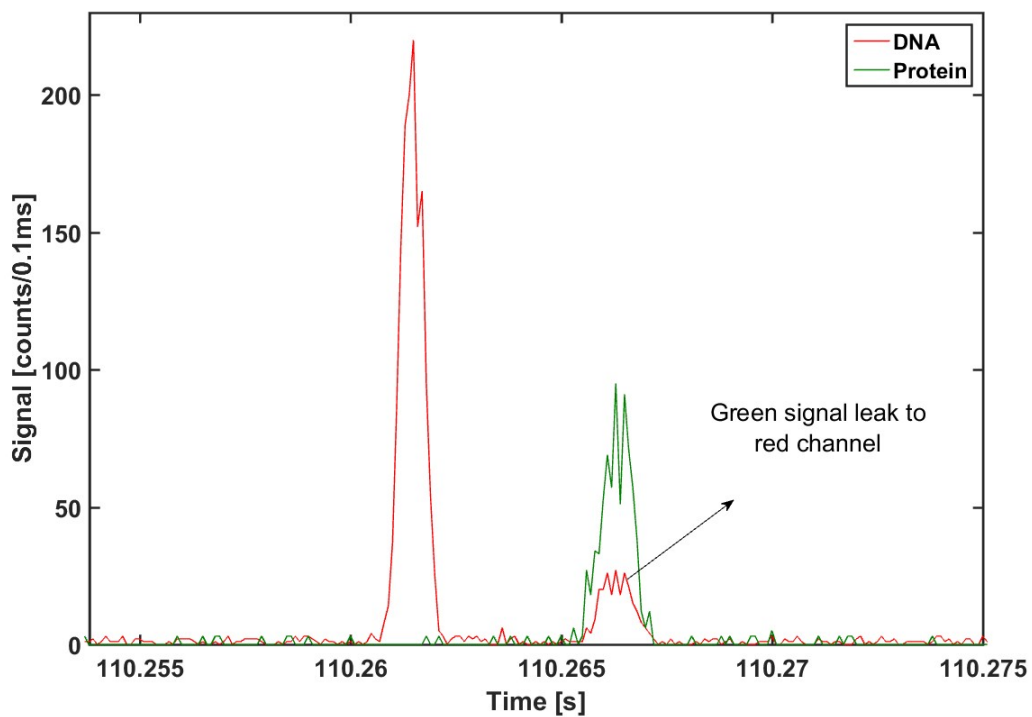

**Supplementary Figure 3:** A magnified view of the peaks observed in Figure 4 during the dual protein-nucleic acid assay experiments. Due to the wide emission band of the Cy-3 fluorophore used as the protein label, a small signal leaks through to the nucleic acid (red) channel when a protein peak (green) is detected. These extraneous peaks are removed from the nucleic acid channel during analysis

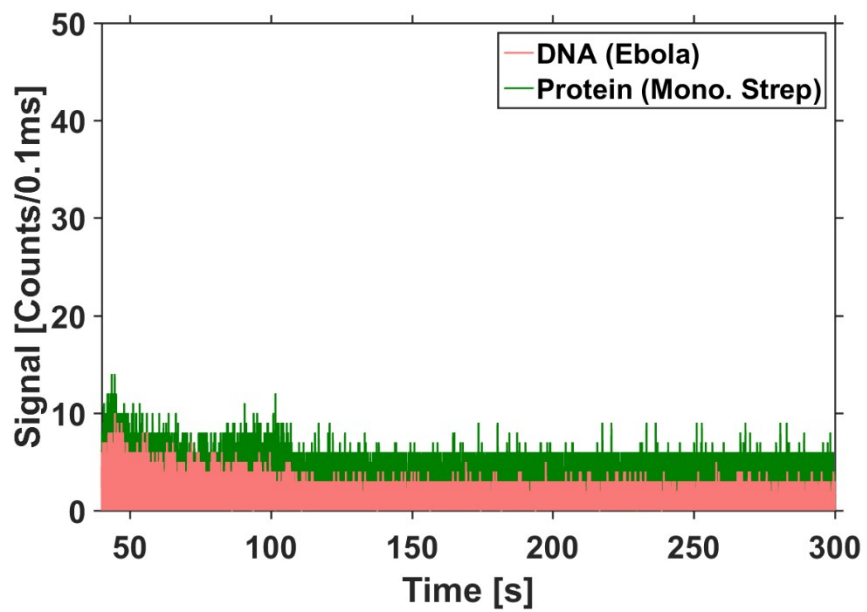

**Supplementary Figure 4:** Simultaneous nucleic acid and protein detection done with non-Zika specific targets (Zaire Ebola AY354458.1, nt. 6832–6931 and monovalent streptavidin) in serum yielded no signals indicating the desired specificity of the assay.
